# Supplementary material for: Novel Polymorphisms in RAPGEF6 Gene Associated with Egg-Laying Rate in Chinese Jing Hong Chicken using Genome-Wide SNP Scan
Source: PubMed Central journal article supplement (PMC6562510; doi:10.3390/genes10050384), 2019-05-20
Supplement: genes-10-00384-s001.pdf [file genes-10-00384-s001.pdf]

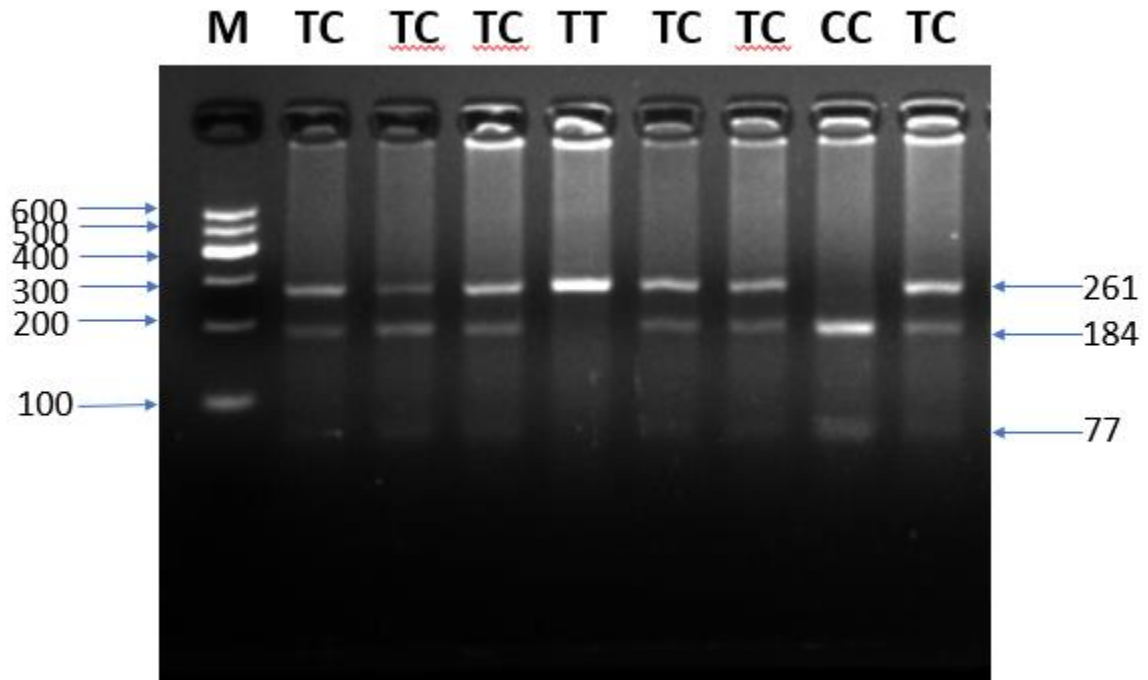

**Figure S1.** The electrophoretic result of PCR-RFLP band patterns of *RAPGEF6* gene at 15836649 bp in chicken. DNA was digested with the restriction enzyme *MnlI* and three types of genotypes (TT, TC and CC), which are shown above (M: DL600 plus).

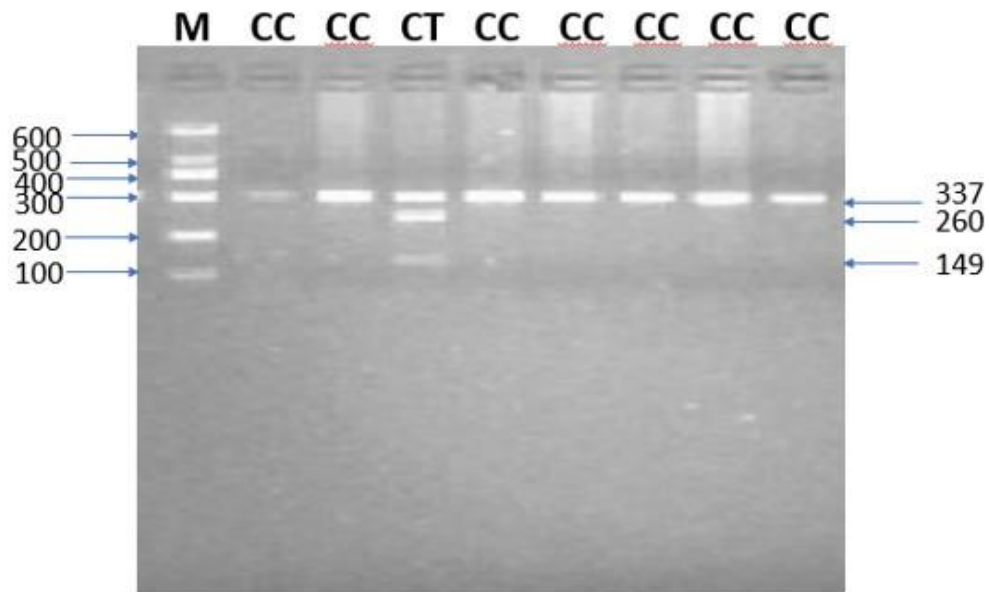

**Figure S2.** The electrophoretic result of PCR-RFLP band patterns of *RAPGEF6* gene at 15843452 bp in chicken. DNA was digested with the restriction enzyme *MboI* and two types of genotypes (CC and CT), which are shown above (M: DL600 plus).

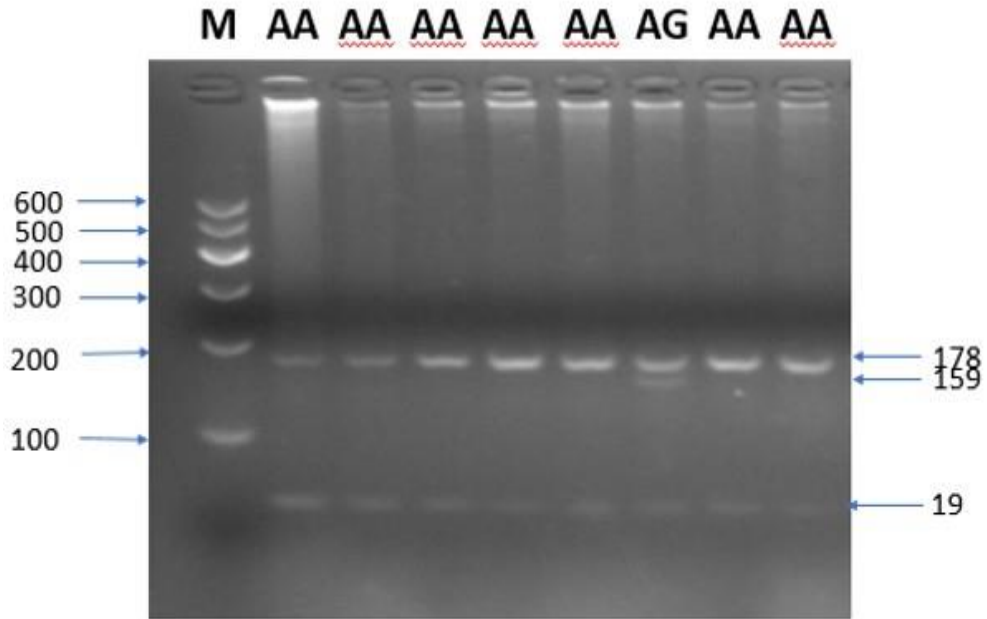

**Figure S3.** The electrophoretic result of PCR-RFLP band patterns of *RAPGEF6* gene at 15829057 bp in chicken. DNA was digested with the restriction enzyme *XmnI* and two types of genotypes (AA and AG), which are shown above (M: DL600 plus).

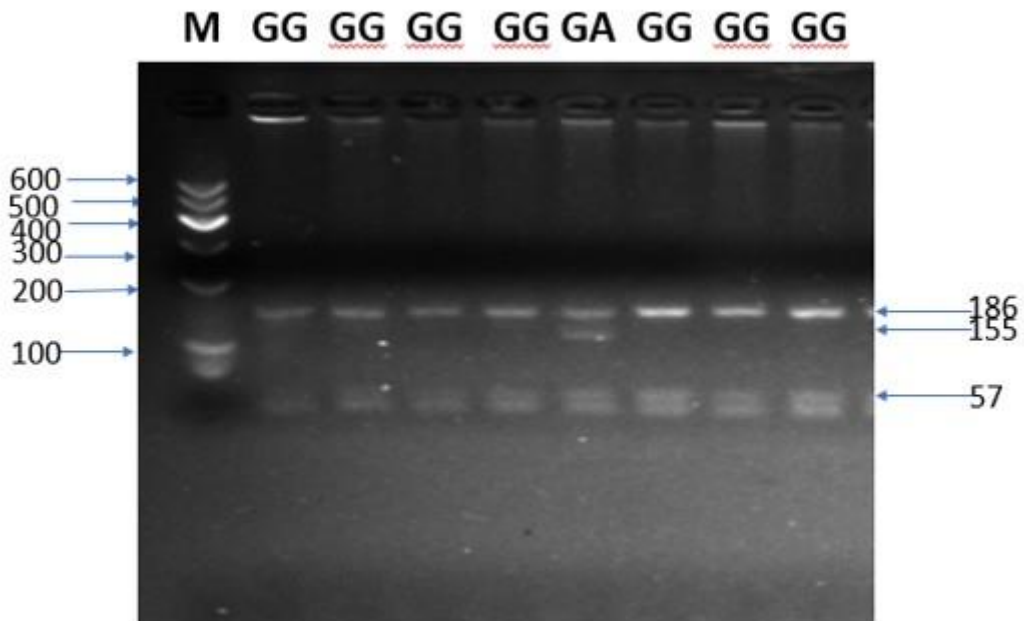

**Figure S4.** The electrophoretic result of PCR-RFLP band patterns of *RAPGEF6* gene at 15845449 bp in chicken. DNA was digested with the restriction enzyme *MwoI* and two types of genotypes (GG and GA), which are shown above (M: DL600 plus).

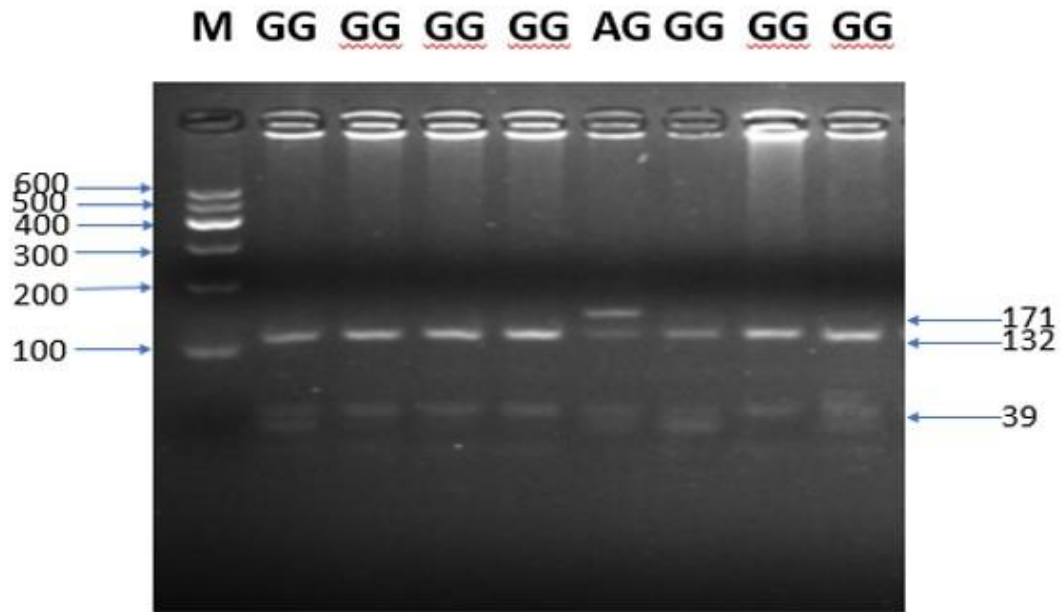

**Figure S5.** The electrophoretic result of PCR-RFLP band patterns of *RAPGEF6* gene at 15829303 bp in chicken. DNA was digested with the restriction enzyme *HphI* and two types of genotypes (AG and GG), which are shown above (M: DL600 plus).

**Supplementary Table S1.** Information of five variants (SNPs) in chicken *RAPGEF6* gene.

| Sl. No. | Probe Set ID | Affy SNP ID   | Position in the genome | Flank                     | Allele A | Allele B |
|---------|--------------|---------------|------------------------|---------------------------|----------|----------|
| 1       | AX-75745366  | Affx-50618245 | 15836649               | CCTGTTAGCC[T/C]CCTTAAGAAG | T        | C        |
| 2       | AX-75745380  | Affx-50618257 | 15843452               | TCATAACCGA[C/T]CCAAATTTGC | C        | T        |
| 3       | AX-75745340  | Affx-50618223 | 15829057               | AGAGACACAG[A/G]AATGAGTGCC | A        | G        |
| 4       | AX-75745388  | Affx-50618264 | 15845449               | TATGAGCCAA[G/A]CCATTACTGC | G        | A        |
| 5       | AX-75745341  | Affx-50618224 | 15829303               | TAGCAGGATC[A/G]CCTTCAAAGT | A        | G        |

**Supplementary Table S2.** Primer information for SNP fragments in amplified chicken *RAPGEF6* gene.

| Sl. No. | Oligo name  | Primers | Sequences (5' to 3')   | Base | GC%  | Product Length | Annealing Temperature(°C) | nmol/OD | MW     |
|---------|-------------|---------|------------------------|------|------|----------------|---------------------------|---------|--------|
| 1       | EGG-A1-F012 | Forward | GCACGAATATGGTTTTTCAG   | 20   | 40.0 | 261            | 54.6                      | 5.1     | 6147.1 |
|         | EGG-A1-R253 | Reverse | AGGGCTCCTTGGCTTCCATT   | 20   | 55.0 |                |                           | 5.7     | 6075.0 |
| 2       | EGG-A2-F064 | Forward | GGAGGGAGAAGAGCCACTAA   | 20   | 55.0 | 486            | 53.5                      | 4.7     | 6249.1 |
|         | EGG-A2-R533 | Reverse | CTGGACGTCTGGAAAATATG   | 20   | 45.0 |                |                           | 5.0     | 6181.1 |
| 3       | EGG-A3-F148 | Forward | CTGTAACACAAGAGACATGAA  | 21   | 38.1 | 178            | 52.0                      | 4.5     | 6456.3 |
|         | EGG-A3-R305 | Reverse | AAAATAGTACACATGGAAGTCT | 21   | 33.3 |                |                           | 4.5     | 6431.3 |
| 4       | EGG-A4-F197 | Forward | CTCCATTCTATTTGTACTT    | 20   | 35.0 | 259            | 53.5                      | 5.7     | 5984.0 |
|         | EGG-A4-R436 | Reverse | TAAAATGTAGAAAGCAGGGT   | 20   | 35.0 |                |                           | 4.6     | 6238.2 |
| 5       | EGG-A5-F171 | Forward | TTAACCCCTTGCAAACACACT  | 20   | 40.0 | 197            | 50.2                      | 5.4     | 6005.0 |
|         | EGG-A5-R348 | Reverse | GCTTCTTTTCAGGTTACCA    | 20   | 40.0 |                |                           | 5.5     | 6049.0 |

**Supplementary Table S3.** The ingredients of *RAPGEF6* PCR-RFLP optimized Restriction Enzyme (RE) digestion mixture.

| Sl. No. | SNP ID      | Restriction Enzyme    | Composition of Digestion Mixture (μL) |              |        |       | Digestion Temperature (°C) | % of Agarose Gel |
|---------|-------------|-----------------------|---------------------------------------|--------------|--------|-------|----------------------------|------------------|
|         |             |                       | 10 × buffer                           | PCR products | Enzyme | ddH2O |                            |                  |
| 1       | AX-75745366 | <i>MnlI</i> (10 U/μL) | 1.0                                   | 5.0          | 0.03   | 4.0   | 37                         | 5                |
| 2       | AX-75745380 | <i>MboI</i> (10 U/μL) | 1.0                                   | 5.0          | 0.03   | 4.0   | 37                         | 5                |
| 3       | AX-75745340 | <i>XmnI</i> (10 U/μL) | 1.0                                   | 5.0          | 0.03   | 4.0   | 37                         | 5                |
| 4       | AX-75745388 | <i>MwoI</i> (10 U/μL) | 1.0                                   | 5.0          | 0.03   | 4.0   | 60                         | 5                |
| 5       | AX-75745341 | <i>HphI</i> (10 U/μL) | 1.0                                   | 5.0          | 0.03   | 4.0   | 37                         | 5                |

**Supplementary Table S4.** The restriction enzymes with their recognition site/cut position used to digest the PCR products.

| Sl. No. | Position in VLDLR | Name of Restriction Enzyme | Recognition Sequence                             | Recognition Site/Cut Position                                    |
|---------|-------------------|----------------------------|--------------------------------------------------|------------------------------------------------------------------|
| 1       | T15835549C        | <i>MnlI</i>                | 5' CCTCN <sub>7</sub><br>3' GGAGN <sub>6</sub>   | 5' CCTC(N) <sub>7</sub> ↓ 3'<br>3' GGAG(N) <sub>6</sub> ↑ 5'     |
| 2       | C15843452T        | <i>MboI</i>                | 5' GATC<br>3' CTAG                               | 5' ↓GATC 3'<br>3' CTAG↑ 5'                                       |
| 3       | A15829057G        | <i>XmnI</i>                | 5' GAANNNTTC<br>3' CTTNNNAAG                     | 5' GAANN↓NNTTC 3'<br>3' CTTNN↑NNAAG 5'                           |
| 4       | G15845449A        | <i>MwoI</i>                | 5' GCNNNNNNNGC<br>3' CGNNNNNNNCG                 | 5' GCNNNNN↓NNGC 3'<br>3' CGNN↑NNNNNCG 5'                         |
| 5       | A15829303G        | <i>HphI</i>                | 5' GGTGAN <sub>8</sub><br>3' CCACTN <sub>7</sub> | 5' GGTGA (N) <sub>8</sub> ↓ 3'<br>3' CCACT (N) <sub>7</sub> ↑ 5' |
